# Supplementary material
Source: MDPI journal article supplement (https://www.mdpi.com/1996-1073/16/24/8007)
Supplement: s1 [file s1]

Supporting Information

## **Kraft Lignin Electro-Oxidation under Ambient Temperature and Pressure**

Jiashuai Han<sup>1</sup>, Roger Lin<sup>1</sup>, Mahdi Salehi<sup>1</sup>, Amirhossein Farzi<sup>1</sup>, Andrew Carkner<sup>1</sup>, Kefang Liu<sup>1</sup>, Omar Abou El-Oon<sup>1</sup>, Olumoye Ajao<sup>2</sup>, Ali Seifitokaldani<sup>1,\*</sup>

<sup>1</sup>Department of Chemical Engineering, McGill University, Montréal, Quebec H3A 0C5, Canada; jiashuai.han@mail.mcgill.ca (J.H.)

<sup>2</sup> Natural Resources Canada, Fuels Sector, Analysis and Operations Branch, Ottawa, Ontario K1A 0E4, Canada

E-mail: ali.seifitokaldani@mcgill.ca

## Cell setup

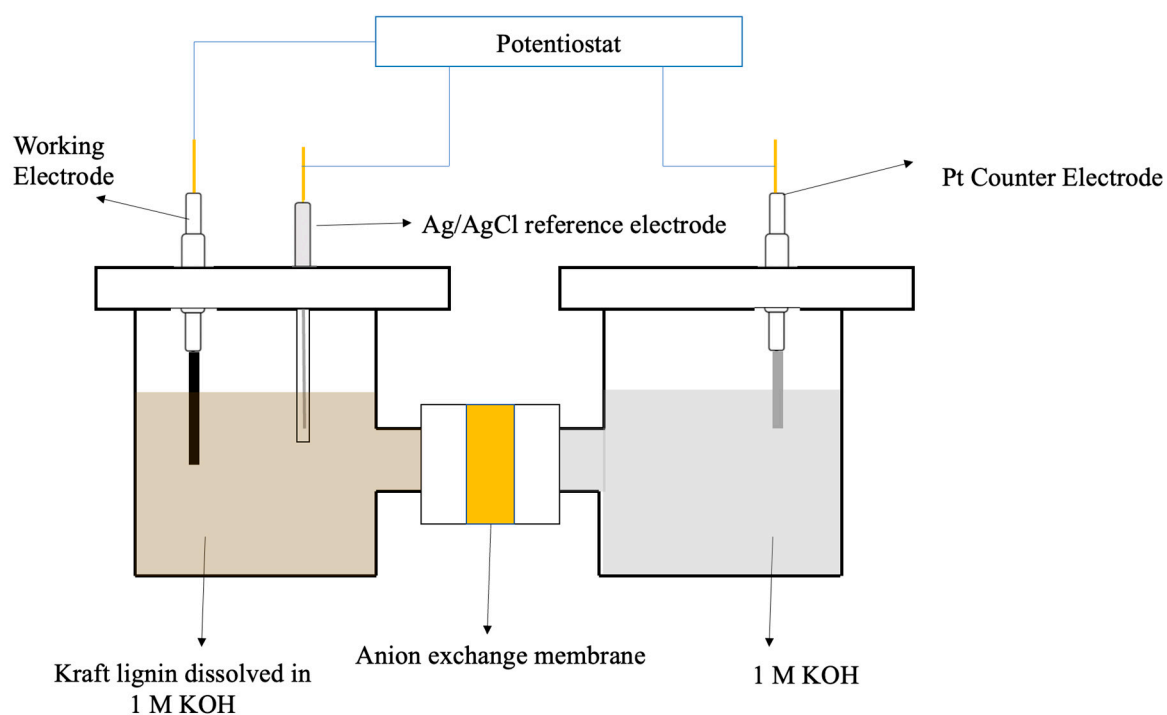

**Figure S1.** H-cell configuration for Kraft lignin oxidation with 1 M KOH on both sides of the cell

## Product analysis

### 1 Liquid-Liquid Extraction and Rotary Evaporation

After the reaction, 25 mL of the lignin solution was taken from the H-cell and acidified with a 1:1 volume ratio of 1 M  $\text{H}_2\text{SO}_4$  so that the unreacted lignin solid could be precipitated out.

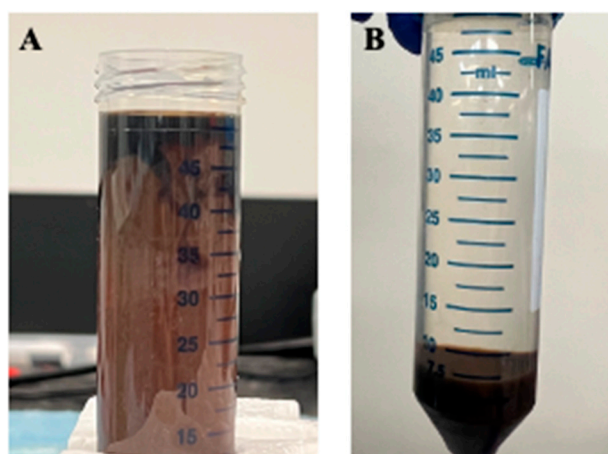

**Figure S2.** Lignin solution acidified with an equal volume of 1 M  $\text{H}_2\text{SO}_4$ , before (A) and after (B) centrifuge.

To accelerate the solid-liquid separation, the mixture was then centrifuged with a Beckman Coulter Allegra® X-12R centrifuge at 3500 rpm and 25 °C for 15 minutes. According to the literature, the most commonly used extraction solvents are ethyl acetate,<sup>9</sup> dichloromethane,<sup>48</sup> chloroform.<sup>12,17</sup> In this project, dichloromethane was selected as the organic solvent for product extraction. After the centrifuge, 20 mL of the clear solution was transferred into a separation funnel and extracted with 20 mL HPLC-grade dichloromethane for three times (60 mL in total). The organic phase from liquid-liquid solvent extraction was collected from the bottom of the separation funnel and put through a fine filter paper filled with sodium sulfate anhydrous to remove the moisture as well as to remove the small lignin solid particle remainder from the centrifuge.

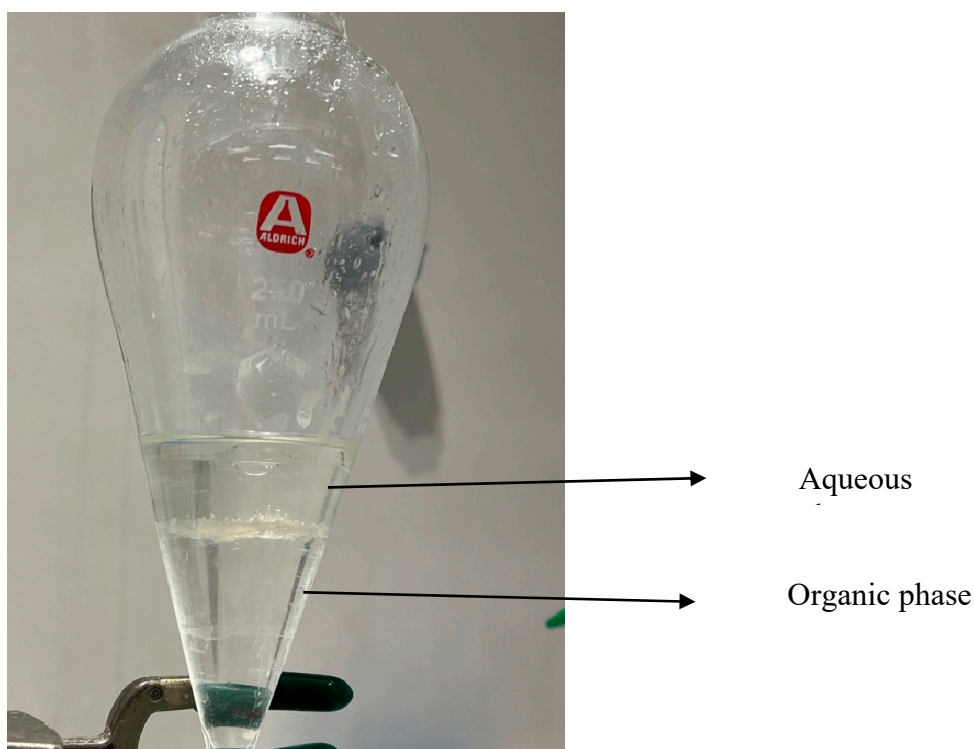

**Figure S3.** Separation funnel with aqueous phase (product solution from centrifuge) on top and organic phase (dichloromethane) at the bottom

The filtered organic solution was then put into a BUCHI® R-210 rotary evaporation system with a water bath at 47 °C, pressured at 773 mbar, and the coolant temperature set at 18 °C. After around 10 minutes, a dried light-brown solid was seen at the bottom of the evaporation flask. The dried solution was then re-concentrated in 3 mL of HPLC-grade dichloromethane before entering GC-MS.

## 2 GC-MS

Gas chromatography (GC) is widely utilized in the field of lignin valorization. It is a common type of chromatography used for separating and analyzing the products retained from the degraded lignin.

The GC method used in this project is GC-MS (Gas Chromatography-Mass Spectrometry). GC-MS is widely used in the lignin valorization field to identify the product species. The GC-MS was performed on Agilent 6890N with a Rxi-5ms column (length: 30 m, inner diameter: 0.25 mm, film, 0.25  $\mu\text{m}$ ) with an Agilent 5975B MS detector. The GC-MS test runs for 26 minutes with an initial temperature of 40  $^{\circ}\text{C}$  and the temperature increases at a rate of 15  $^{\circ}\text{C}/\text{min}$  and the temperature is maintained at 250  $^{\circ}\text{C}$  until the end of the analysis. Helium was used as the carrier gas at a flow rate of 1.5 mL/min. The ion masses were recorded in the range of 40 to 300 (m/z) in the scan mode. The detected compounds were identified according to the NIST library database. As the reaction time of 1500 s was not long enough for the system to generate enough products to significantly differentiate the products with small yields from the noises, to enlarge the absolute product yield. The electro-oxidative reaction was performed in the same H-cell described above under 1 V vs Ag/AgCl electrode for 10 hours and Ni foam was used for the GC-MS product preparation.

### GC-MS chromatogram

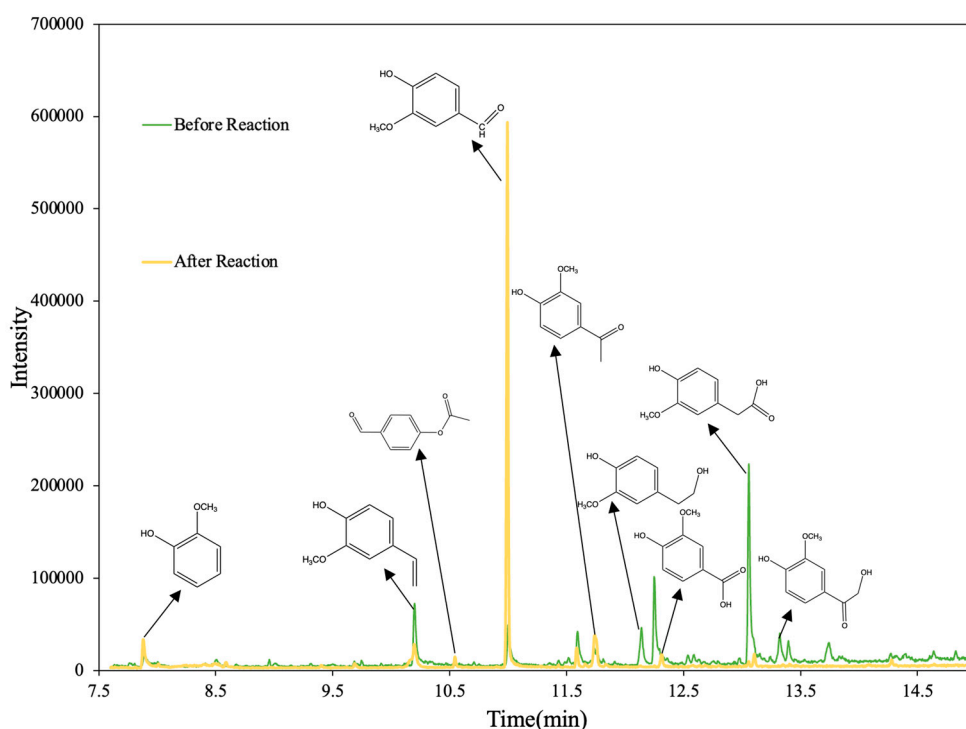

**Figure S4.** GC-MS Chromatogram of extracted lignin products before (green) and after (yellow) reaction. This is the GC-MS chromatogram showing the identified chemical species with their respective retention times.

### Vanillin and Vanillic acid HPLC calibration curve

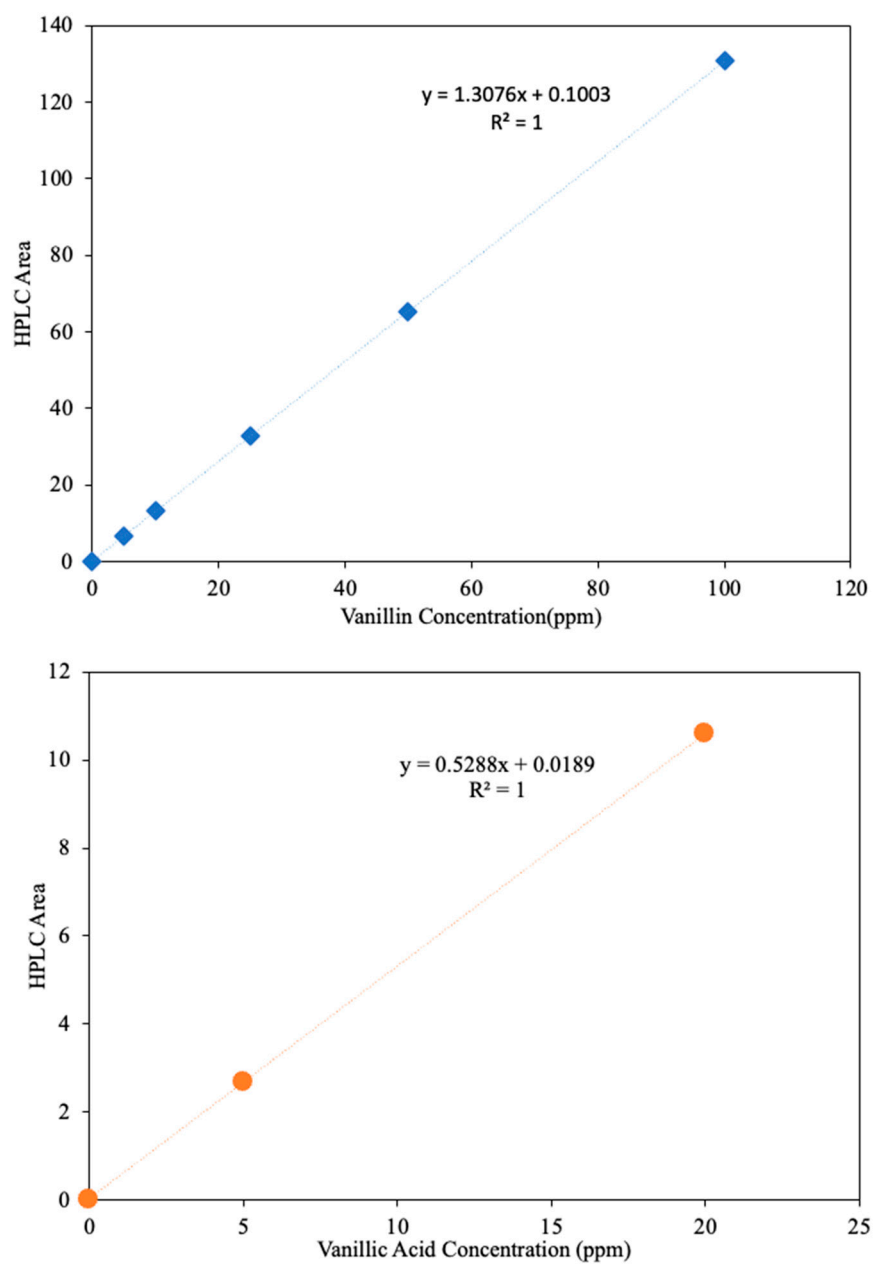

Figure S5. Vanillin and Vanillic Acid calibration curve for HPLC-UV

## HPLC Chromatogram

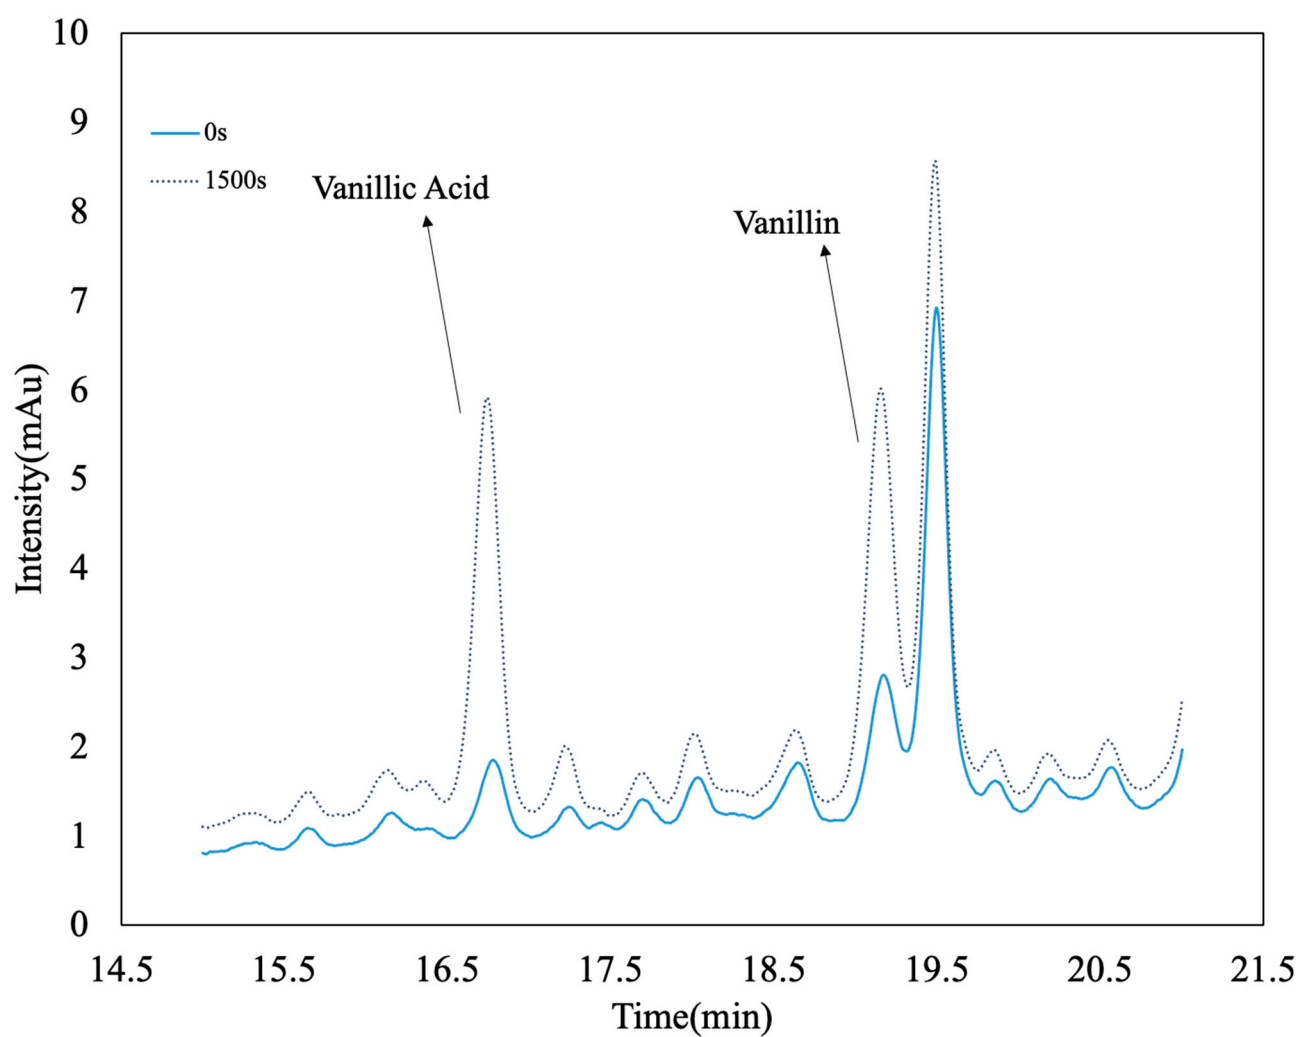

**Figure S6.** HPLC chromatogram for 200 nm Ni catalyst with 1 V applied voltage after 0 s and 1500 s

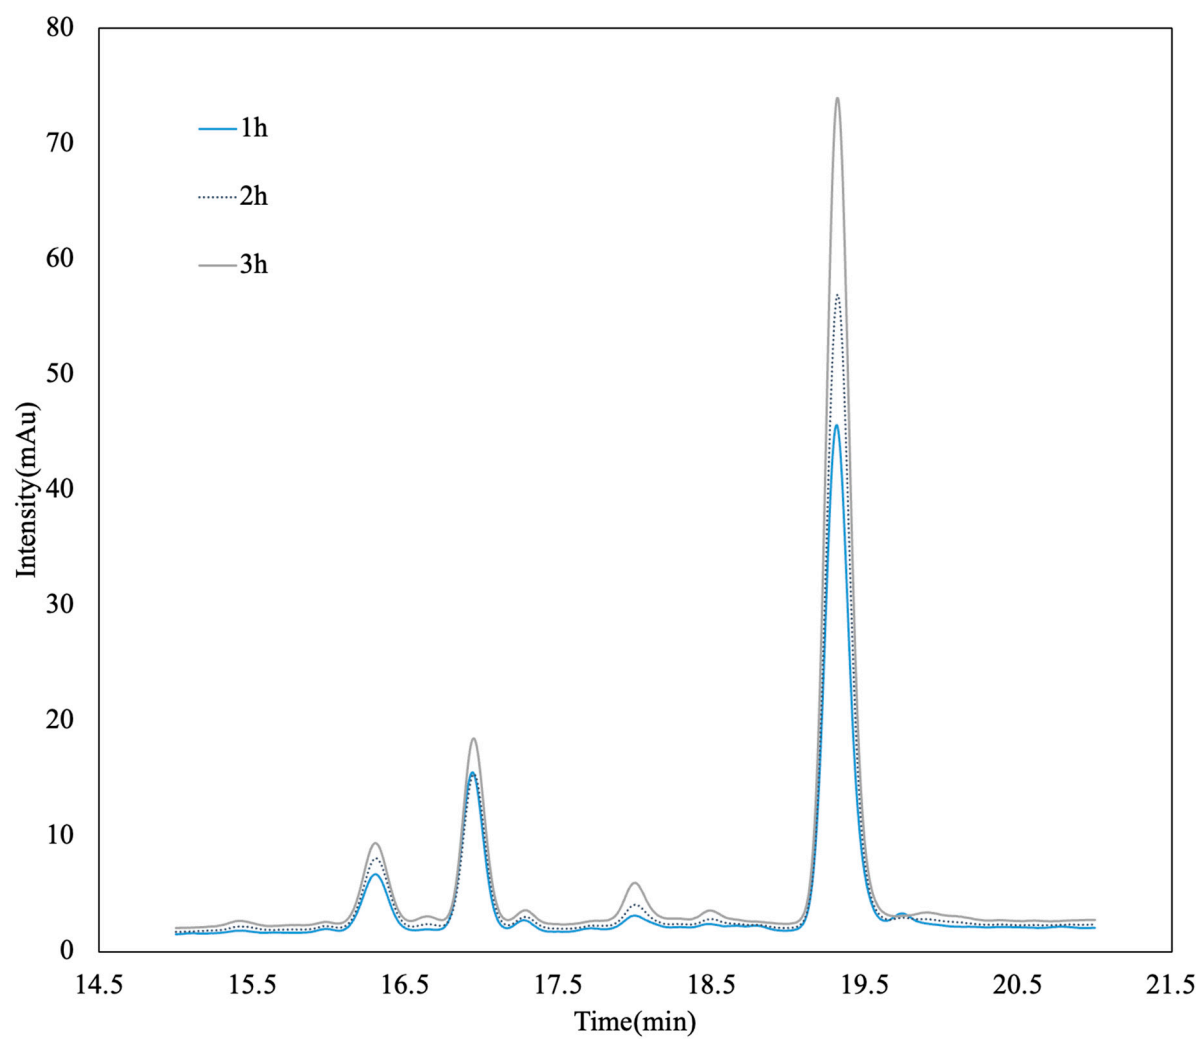

**Figure S7.** HPLC chromatogram for Ni foam catalyst with 1V applied voltage after 1 hour, 2 hours and 3 hours reaction.

## ECSA

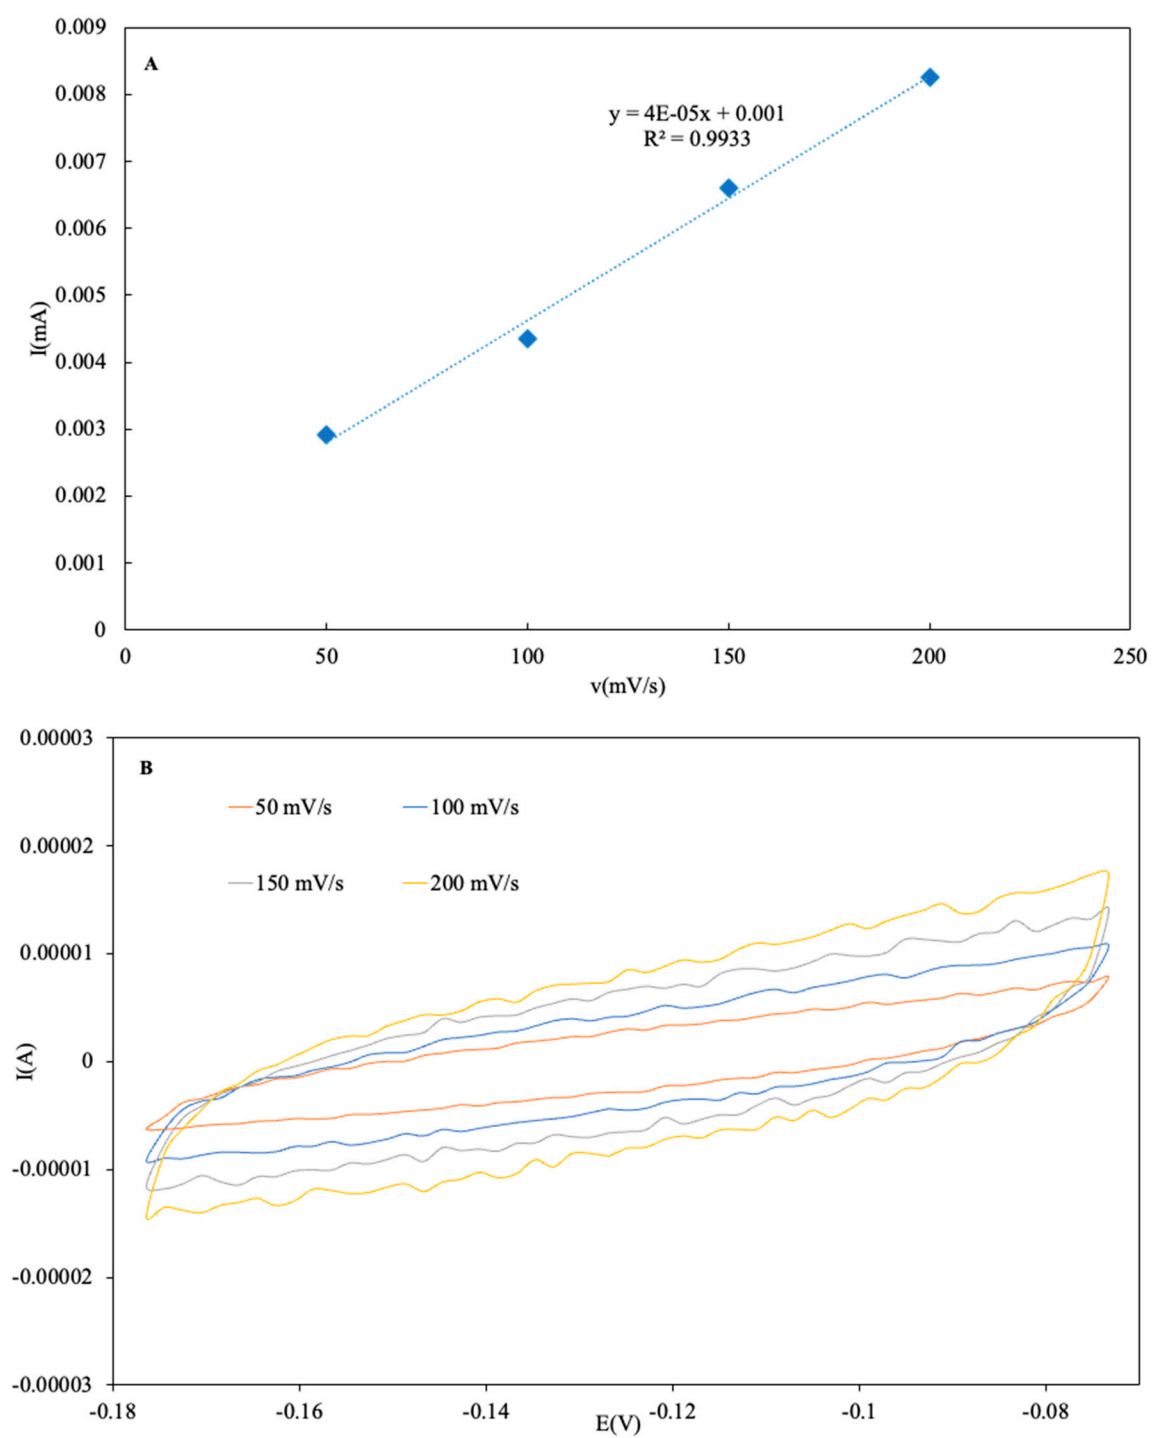

**Figure S8.** A: Double-layer capacitance plot for 100 nm Ni B: ECSA scans for 100 nm Ni



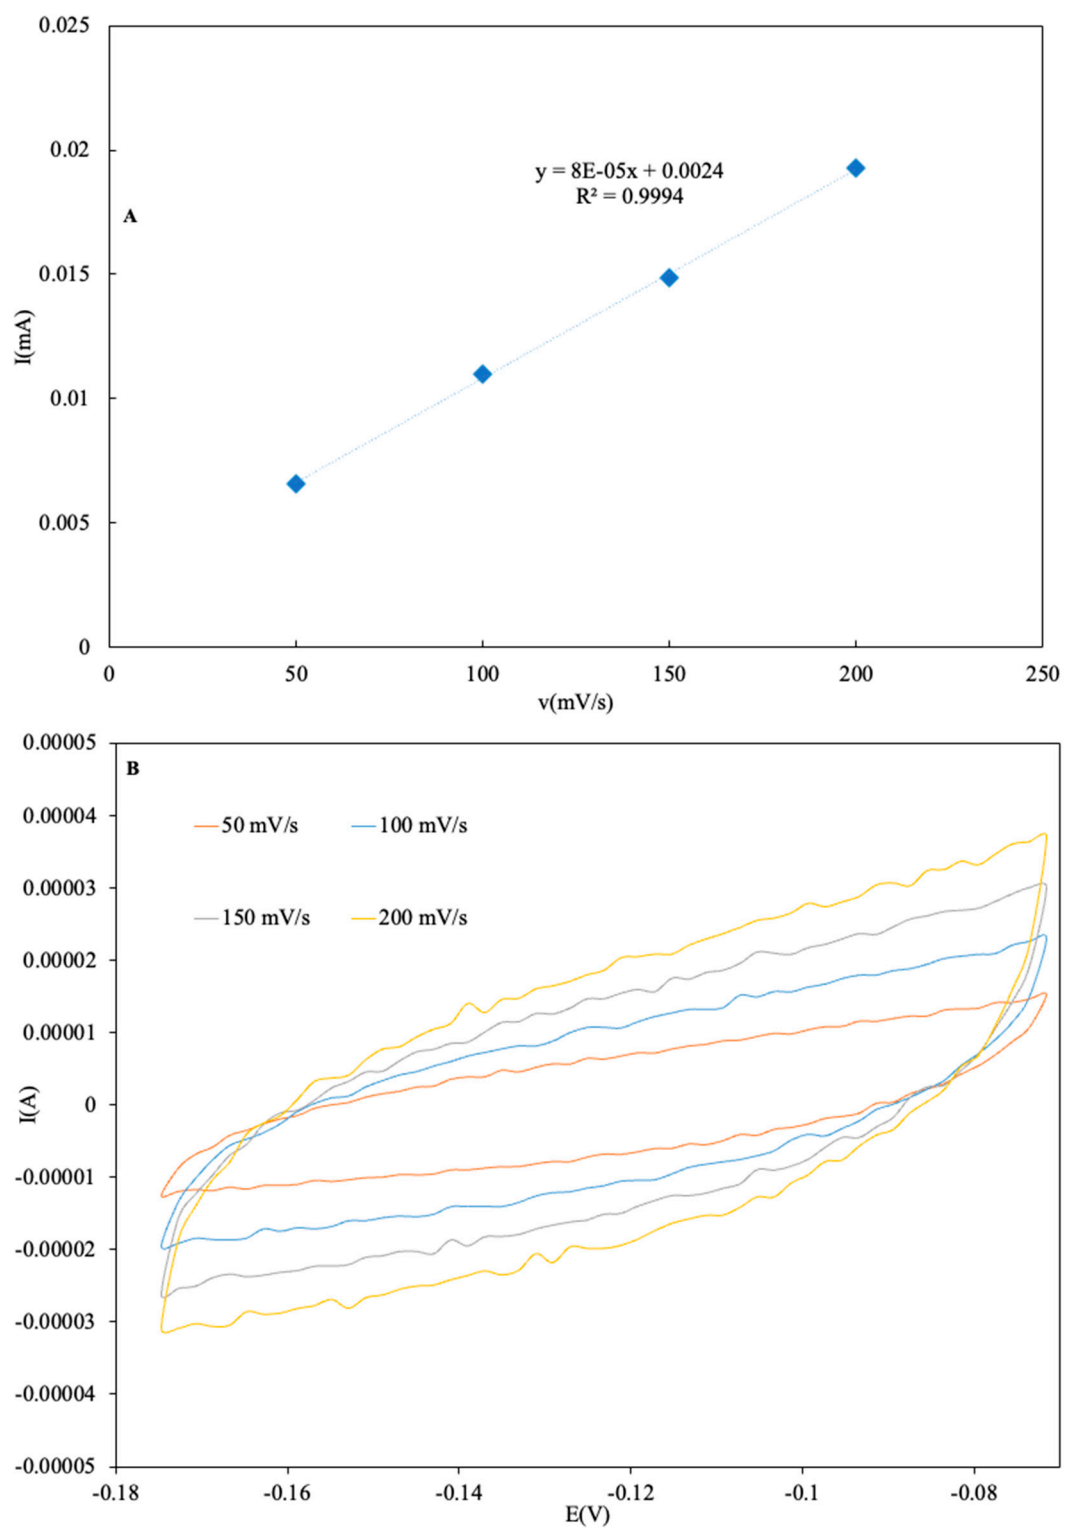

**Figure S9.** A: Double-layer capacitance plot for 200 nm Ni B: ECSA scans for 200 nm Ni

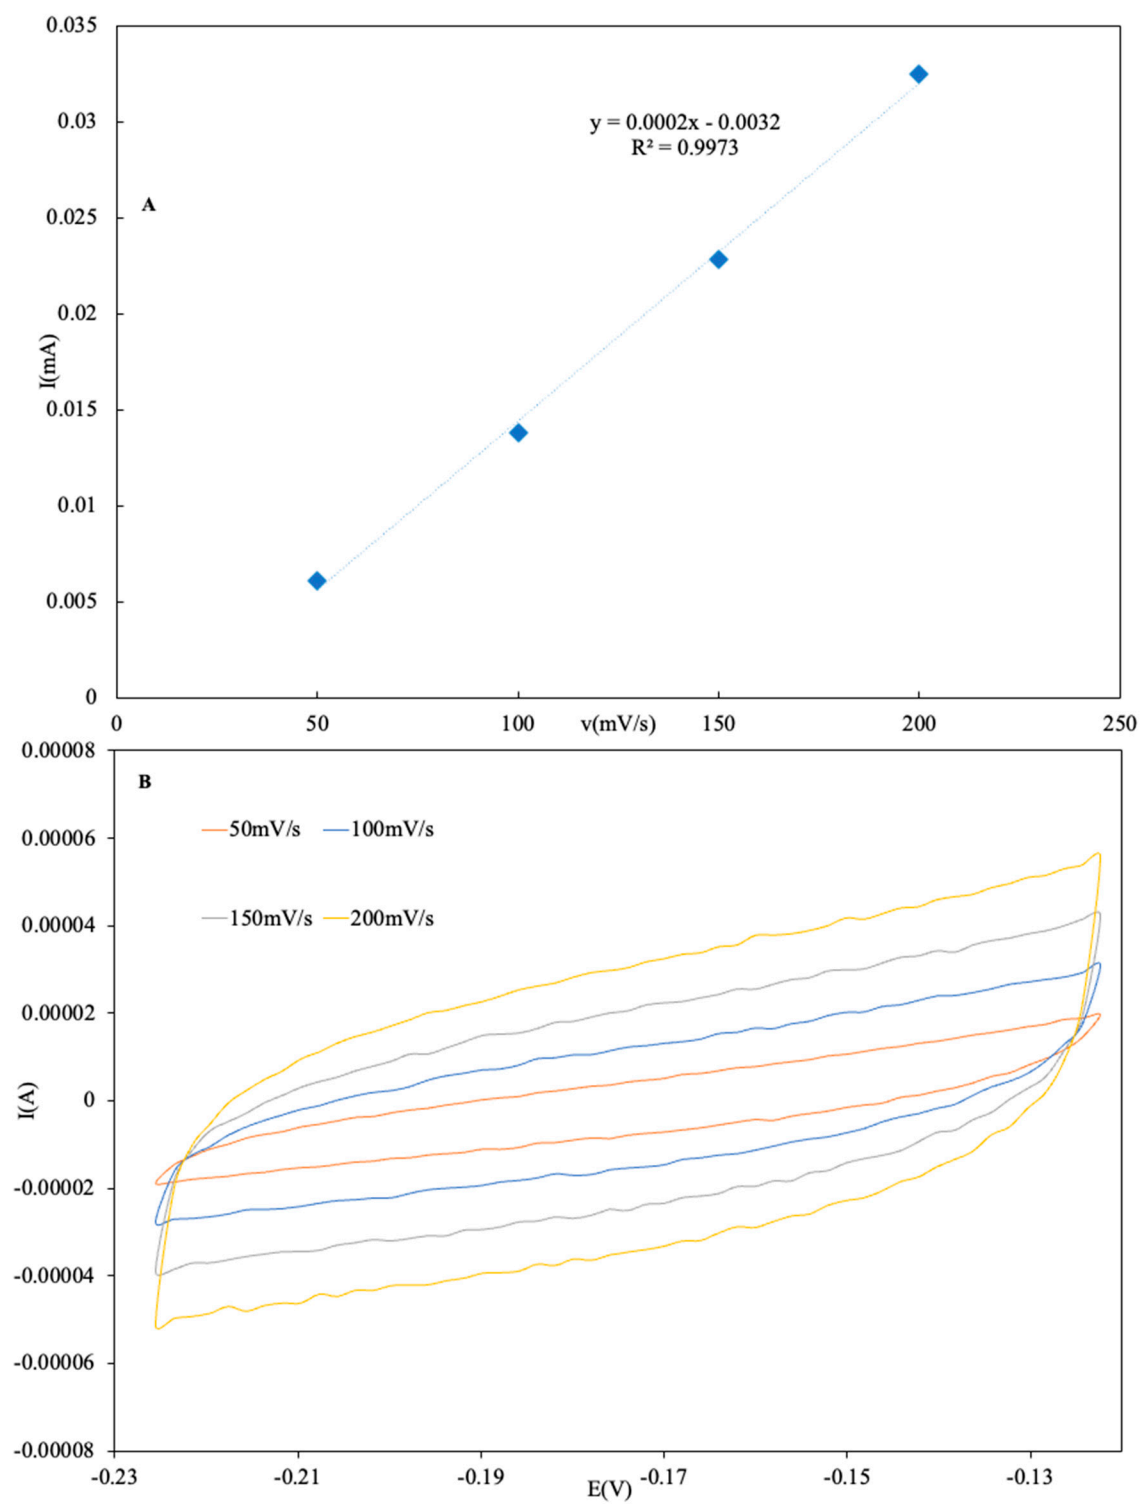

**Figure S10.** A: Double-layer capacitance plot for Ni foam B: ECSA scans for Ni foam
